# Supplementary material for: Commiphora molmol Modulates Glutamate-Nitric Oxide-cGMP and Nrf2/ARE/HO-1 Pathways and Attenuates Oxidative Stress and Hematological Alterations in Hyperammonemic Rats
Source: Oxid Med Cell Longev. 2017 Jun 28;2017:7369671. doi: 10.1155/2017/7369671 (PMC5506469; doi:10.1155/2017/7369671)
Supplement: Supplementary file 1 — Supplementary Figure I: DPPH radical scavenging activity of C. molmol resin extract. Data are the mean values of triplicate and expressed as mean ± SEM. [file 7369671.f1.docx]

**SupplementaryMaterial**

***Commiphora molmol* modulates glutamate-nitric oxide-cGMP and Nrf2/ARE/HO-1 pathways and attenuates oxidative stress and hematological alterations in hyperammonemic rats**

**Ayman M. Mahmoud1,2*, Sultan Alqahtani3,4, Sarah I. Othman5, Mousa O. Germoush6, Omnia E. Hussein1, Gadh Al-Basher7, Jong Seong Khim8, Maha A. Al-Qaraawi5, Hanan M. Al-Harbi5, Abdulmannan Fadel9, Ahmed A. Allam7, 10**

1Physiology Division, Department of Zoology, Faculty of Science, Beni-Suef University, Beni-Suef, Egypt.

2Department of Endocrinology, Diabetes & Nutrition, Charité-University Medicine Berlin, Berlin, Germany.

3College of Medicine, King Saud bin Abdulaziz University for Health Science (KSAU-HS), Riyadh, Saudi Arabia.

4King Abdullah International Medical Research Center (KAIMRC), Riyadh, Saudi Arabia.

5Biology Department, Faculty of Science, Princess Nourah bint Abdulrahman University, Riyadh, Saudi Arabia.

6Biology Department, Faculty of Science, Aljouf University, Aljouf, Saudi Arabia.

7Zoology Department, College of Science, King Saud University, Riyadh, Saudi Arabia.

8School of Earth and Environmental Sciences & Research Institute of Oceanography, Seoul National University, Seoul, Republic of Korea.

9School of Healthcare Science, Manchester Metropolitan University, Manchester, United Kingdom.

10Zoology Department, Faculty of Science, Beni-Suef University, Beni-Suef, Egypt.

**Corresponding author:**

**Ayman M. Mahmoud, PhD**

Physiology Division, Zoology Department, Faculty of Science, Beni-Suef University, Salah Salim St., 62514, Beni-Suef, Egypt.

Tel.: +201144168280. E-mail: [ayman.mahmoud@science.bsu.edu.eg](mailto:ayman.mahmoud@science.bsu.edu.eg)


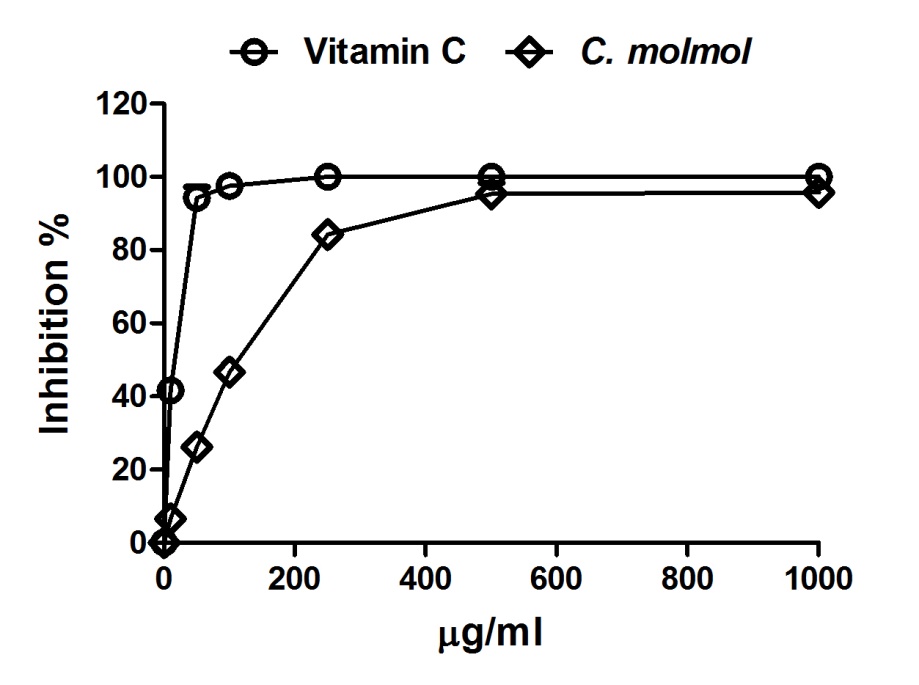


**Supplementary Figure I**: DPPH radical scavenging activity of *C. molmol* resin extract. Data are the mean values of triplicate and expressed as mean ± SEM.
